# Supplementary material for: Polycaprolactone Nanofibers Functionalized by Fibronectin/Gentamicin and Implanted Silver for Enhanced Antibacterial Properties, Cell Adhesion, and Proliferation
Source: Polymers (Basel). 2024 Jan 17;16(2):261. doi: 10.3390/polym16020261 (PMC10819432; doi:10.3390/polym16020261)
Supplement: Supplementary file 1 [file polymers-16-00261-s001.zip › polymers-2759092-supplementary.pdf]

## Article

# Polycaprolactone Nanofibers Functionalized by Fibronectin/Gentamicin and Implanted Silver for Enhanced Antibacterial Properties, Cell Adhesion, and Proliferation

Elizaveta S. Permyakova <sup>1</sup>, Anastasiya O. Solovieva <sup>2</sup>, Natalia Sitnikova <sup>2</sup>, Philipp V. Kiryukhantsev-Korneev <sup>1</sup>, Magzhan K. Kutzhanov <sup>1</sup>, Alexander N. Sheveyko <sup>1</sup>, Sergey G. Ignatov <sup>1,3,4</sup>, Pavel V. Slukin <sup>1,3</sup>, Dmitry V. Shtansky <sup>1</sup> and Anton M. Manakhov <sup>1,2,\*</sup>

<sup>1</sup> Research Laboratory “Inorganic Nanomaterials”, National University of Science and Technology “MISIS”, Moscow 119049, Russia;

permyakova.elizaveta@gmail.com (E.S.P.); kiruhancev-korneev@yandex.ru (P.V.K.-K.); makonyo95year@gmail.com (M.K.K.); sheveyko@mail.ru (A.N.S.); ignatov.sergei@gmail.com (S.G.I.); xopgi@yandex.ru (P.V.S.); shtansky@shs.misis.ru (D.V.S.)

<sup>2</sup> Research Institute of Clinical and Experimental Lymphology—Branch of the ICG SB RAS, 2 Timakova st., Novosibirsk 630060, Russia; solovey\_ao@mail.ru (A.O.S.); sitnikovanat9@gmail.com (N.S.)

<sup>3</sup> State Research Center for Applied Microbiology and Biotechnology, Obolensk 142279, Russia

<sup>4</sup> Lomonosov Moscow State University, GSP-1, 1 Leninskiye Gory, Moscow 119991, Russia

\* Correspondence: ant-manahov@ya.ru (A.M.)

The samples used in the study were: PCL-ref (r), PCL-Fbn-Ag 5min (1), PCL-Fbn-Ag 2.5min (2), PCL-GM-Ag 2.5min (3), PCL-GM-Ag 5min (4), PCL-COOH (5), PCL-GM (6), PCL-Fbn (7). The Figures S1-S13 demonstrated optical images of samples in Petri dishes after exposure to the pathogens.

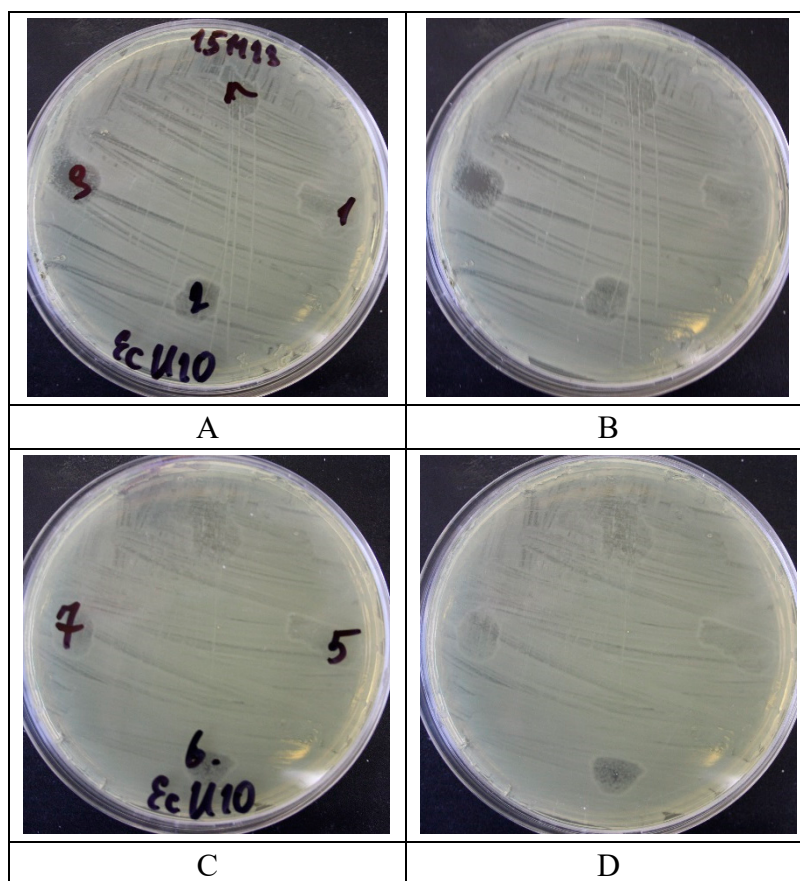

**Figure S1.** Photo of petri dishes with *E. coli* strain U20 when exposed to samples ref (r), 1, 2 and 3 (A,B), and 4, 5, 6 and 7 (C,D).

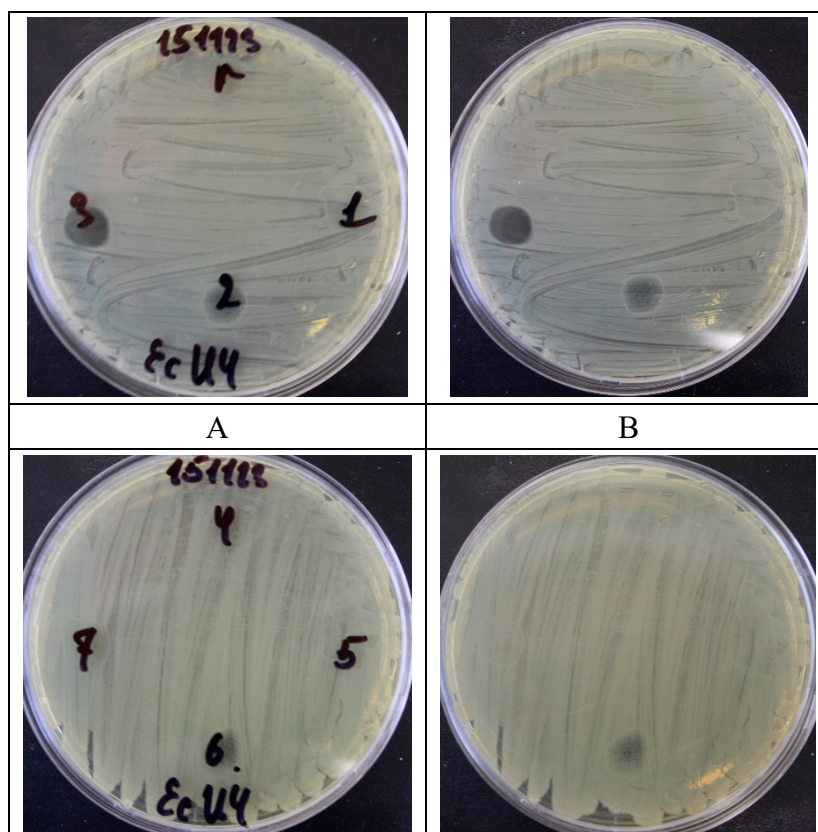

|   |   |
|---|---|
| C | D |
|---|---|

**Figure S2.** Photo of petri dishes with *E. coli* U4 strain when exposed to samples ref (r), 1, 2 and 3 (A,B), and 4, 5, 6 and 7 (C,D).

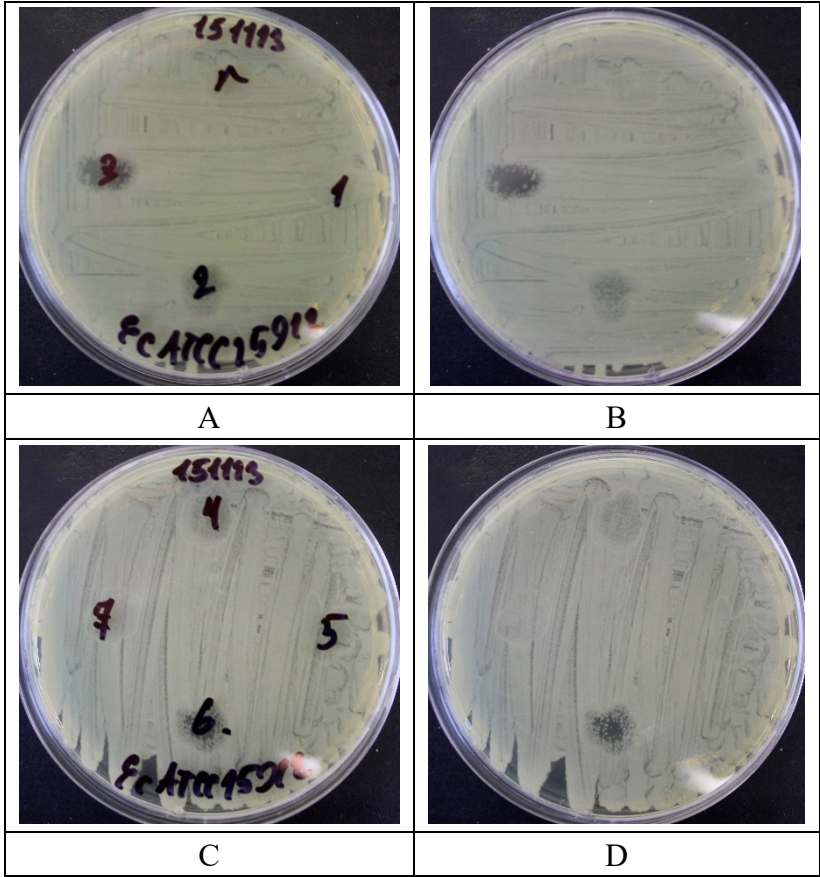

**Figure S3.** Photo of petri dishes with *E. coli* strain ATCC25922 when exposed to samples ref (r), 1, 2 and 3 (A,B), and 4, 5, 6 and 7 (C,D).

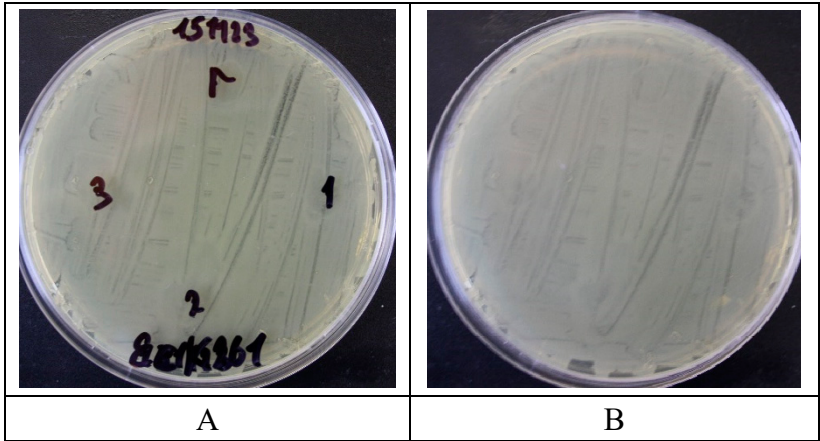

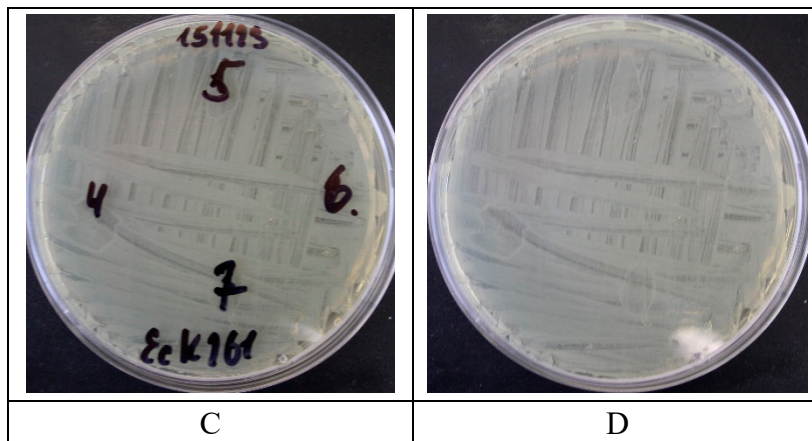

**Figure S4.** Photo of petri dishes with *E. coli* strain K261 when exposed to samples ref (r), 1, 2 and 3 (A,B), and 4, 5, 6 and 7 (C,D).

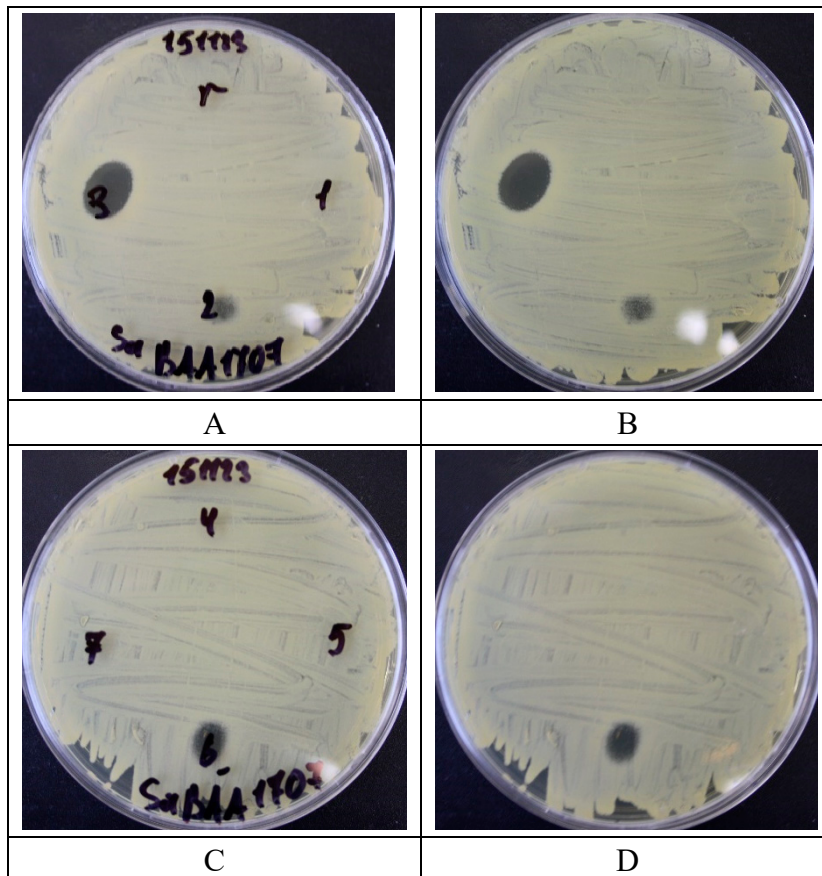

**Figure S5.** Photo of petri dishes with *S. aureus* strain BAA1707 (MW2) when exposed to samples ref (r), 1, 2 and 3 (A,B), and 4, 5, 6 and 7 (C,D).

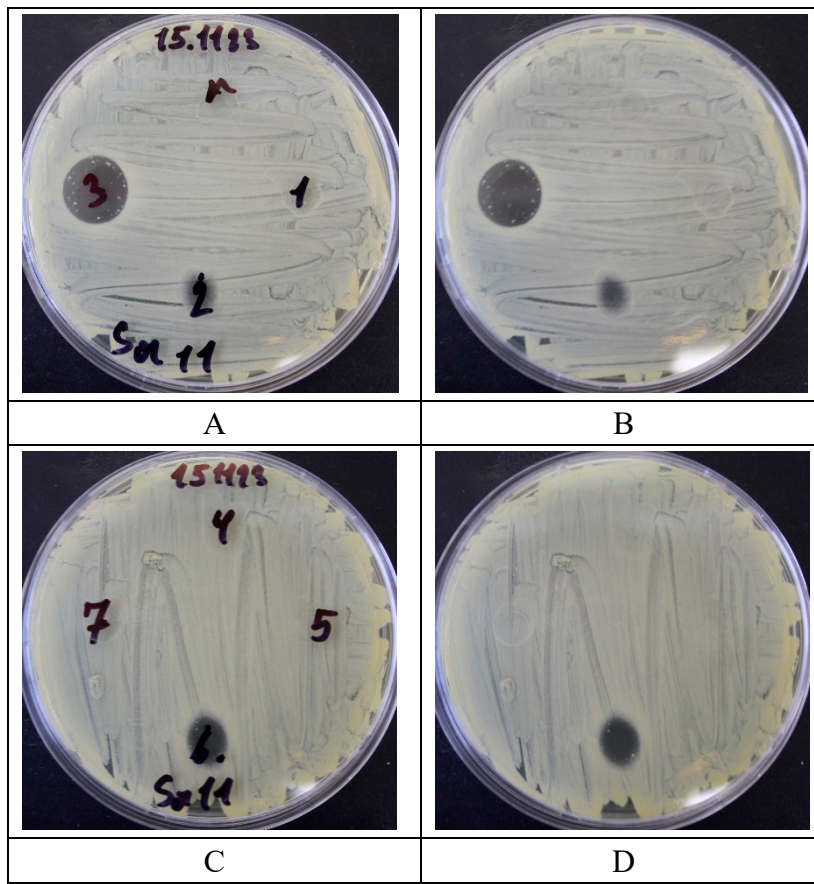

Figure S6. Photo of petri dishes with *S. aureus* strain 11 when exposed to samples ref (r), 1, 2 and 3 (A,B), and 4, 5, 6 and 7 (C,D).

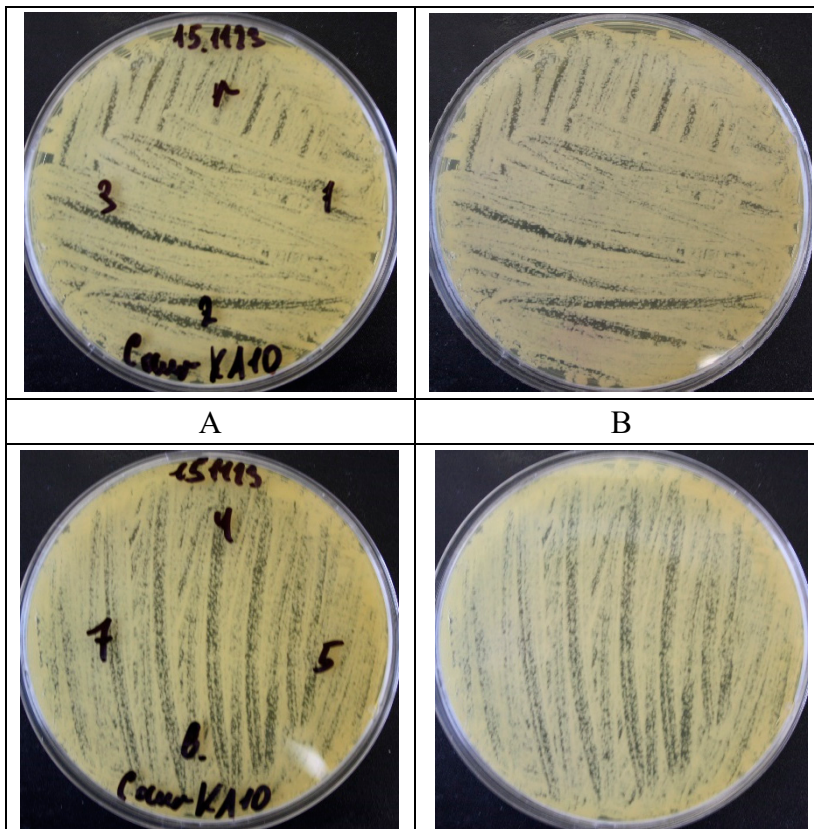

|   |   |
|---|---|
| C | D |
|---|---|

**Figure S7.** Photo of petri dishes with *C. auris* strain KA10 when exposed to samples ref (r), 1, 2 and 3 (A,B), and 4, 5, 6 and 7 (C,D).

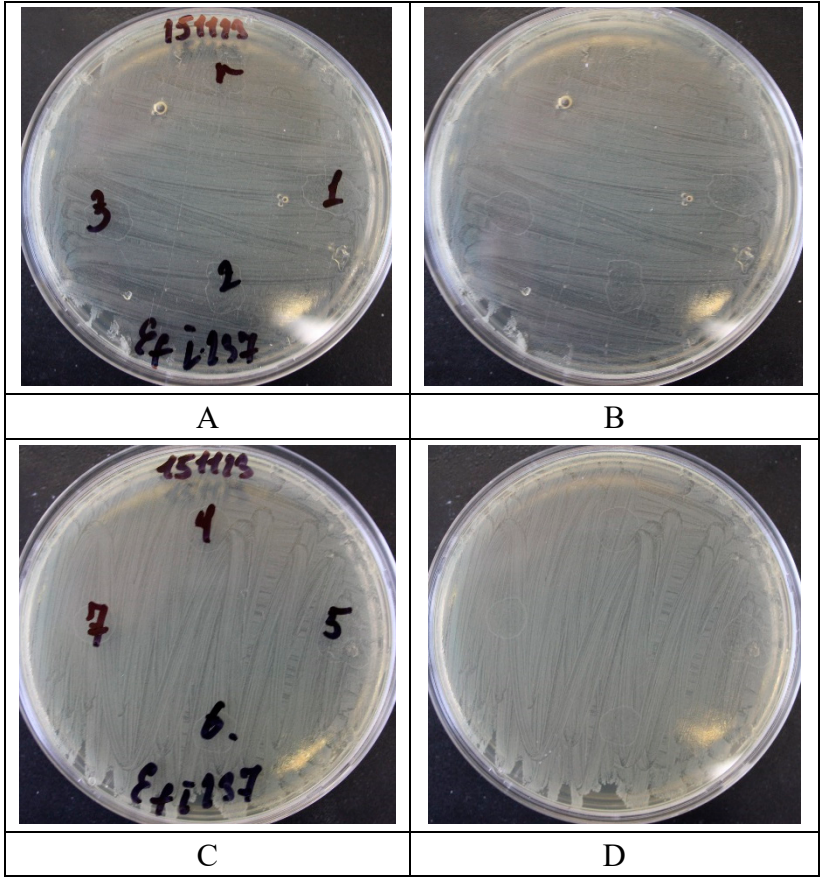

**Figure S8.** Photo of petri dishes with *E. faecium* i237 strain when exposed to samples ref (r), 1, 2 and 3 (A,B), and 4, 5, 6 and 7 (C,D).

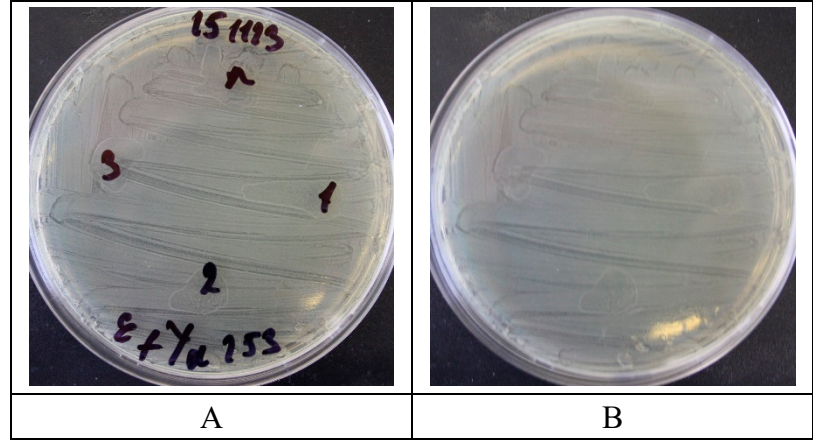

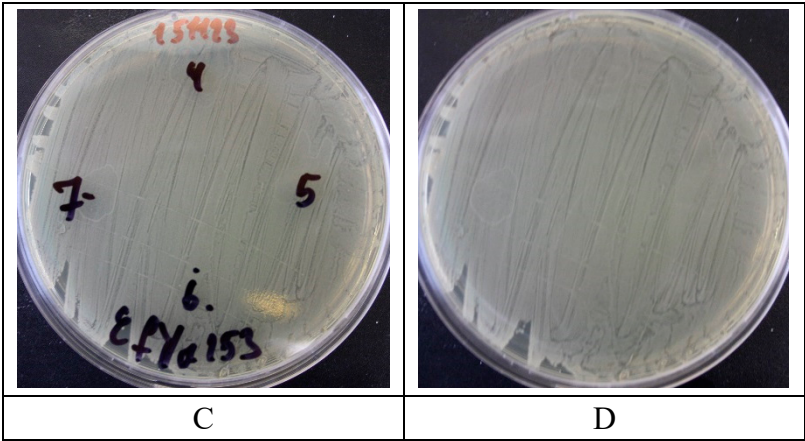

**Figure S9.** Photo of petri dishes with *E. faecium* strain Ya253 when exposed to samples ref (r), 1, 2 and 3 (A,B), and 4, 5, 6 and 7 (C,D).

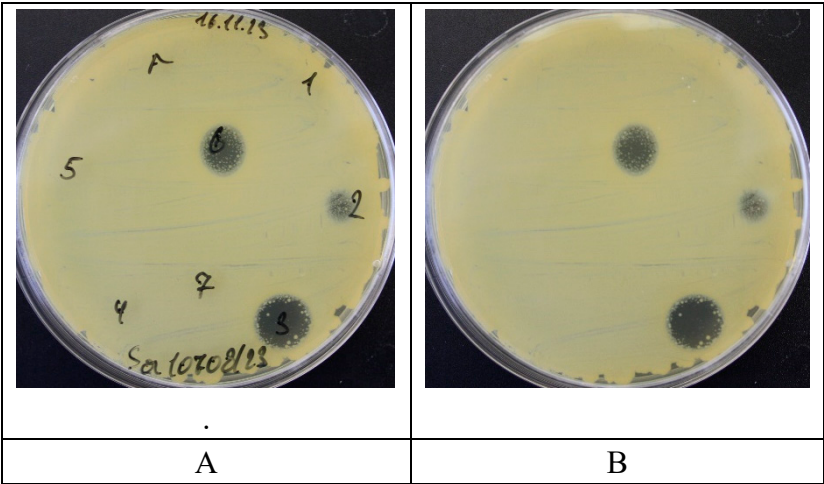

**Figure S10.** Photo of petri dishes with *S. aureus* strain 10708/23 when exposed to ref (r), 1, 2, 3, 4, 5, 6 and 7 samples.

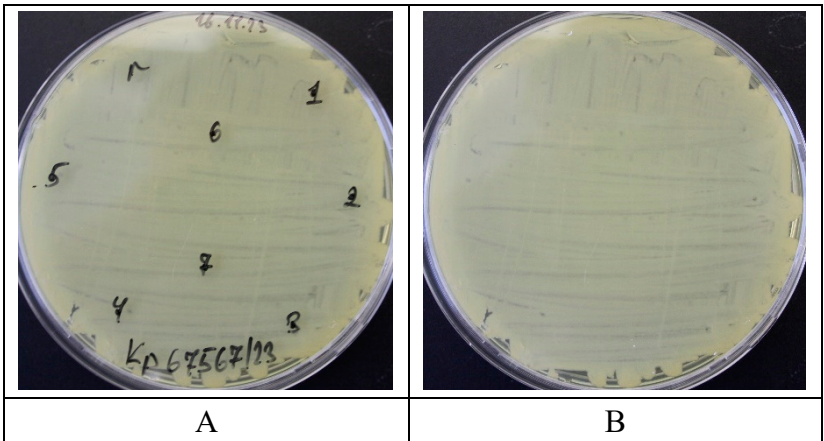

**Figure S11.** Photo of petri dishes with *Klebsiella pneumoniae* strain 67565/23 when exposed to samples ref (r), 1, 2, 3, 4, 5, 6 and 7.

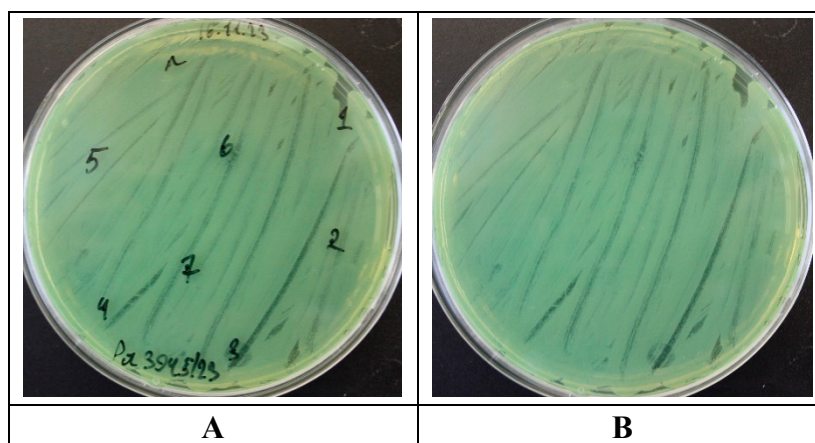

**Figure S12.** Photo of petri dishes with *Pseudomonas aeruginosa* strain 3945/23 when exposed to samples ref (r), 1, 2, 3, 4, 5, 6 and 7.

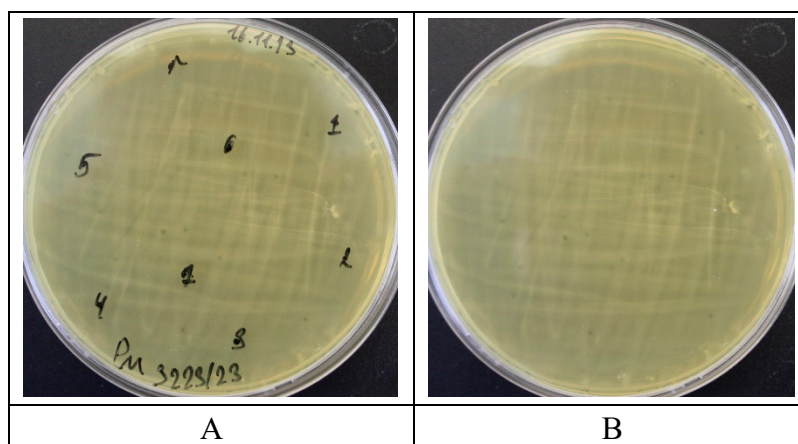

**Figure S13.** Photo of petri dishes with *Proteus mirabilis* strain 3223/23 when exposed to samples ref (r), 1, 2, 3, 4, 5, 6 and 7.

Photo of the same Petri dish with numbers of samples (A- left part) and without numbers (B –right part)
